# Supplementary material
Source: HighWire-hosted journal article supplement (https://jnm.snmjournals.org/highwire/filestream/94968/field_highwire_adjunct_files/0/173708_Supplemental_Data.pdf)

**SUPPLEMENTAL TABLE 1:** Spearman correlation coefficient (*R*) for 31 texture indices between AR (autoradiography) and RAR (resampled autoradiography) images or between RAR and SRAR (smoothed and resampled autoradiography) images. The texture indices are arranged in groups within which the texture indices are highly correlated (16).

|                  | AR vs. RAR | RAR vs. SRAR |
|------------------|------------|--------------|
| Homogeneity      | 0.71*      | 0.69*        |
| Correlation      | 0.22       | 0.72*        |
| Contrast (CM)    | 0.76*      | 0.62*        |
| Dissimilarity    | 0.72*      | 0.65*        |
| Contrast (NGLDM) | 0.93*      | 0.97*        |
| Energy           | 0.85*      | 0.95*        |
| Entropy          | 0.77*      | 0.96*        |
| Coarseness       | 0.91*      | 0.96*        |
| SRE              | 0.65*      | 0.60*        |
| RP               | 0.64*      | 0.61*        |
| SZE              | -0.61*     | 0.67*        |
| ZP               | 0.65*      | 0.62*        |
| LRE              | 0.62*      | 0.62*        |
| LZE              | 0.65*      | 0.62*        |
| LZHGE            | -0.49*     | 0.72*        |
| LGRE             | 0.95*      | 0.70*        |
| SRLGE            | 0.95*      | 0.70*        |
| LRLGE            | 0.83*      | 0.74*        |
| LGZE             | 0.92*      | 0.66*        |
| SZLGE            | 0.91*      | 0.60*        |
| HGRE             | 0.82*      | 0.63*        |
| SRHGE            | 0.79*      | 0.62*        |
| LRHGE            | 0.81*      | 0.68*        |
| HGZE             | 0.78*      | 0.59*        |
| SZHGE            | 0.69*      | 0.54*        |
| GLNUr            | 0.90*      | 0.93*        |
| RLNU             | 0.86*      | 0.98*        |
| GLNUz            | 0.30       | 0.92*        |
| ZLNU             | 0.90*      | 0.97*        |
| Busyness         | 0.43*      | -0.26        |
| LZLGE            | 0.69*      | 0.74*        |

CM: Co-occurrence matrix

NGLDM: neighborhood gray-level dependence matrix

\**P* value of Spearman correlation coefficient lower than 5%.

**SUPPLEMENTAL FIGURE 1:** Plots of index measured from autoradiography (AR) images as a function of index measured from PET images and the corresponding Bland-Altman plots.

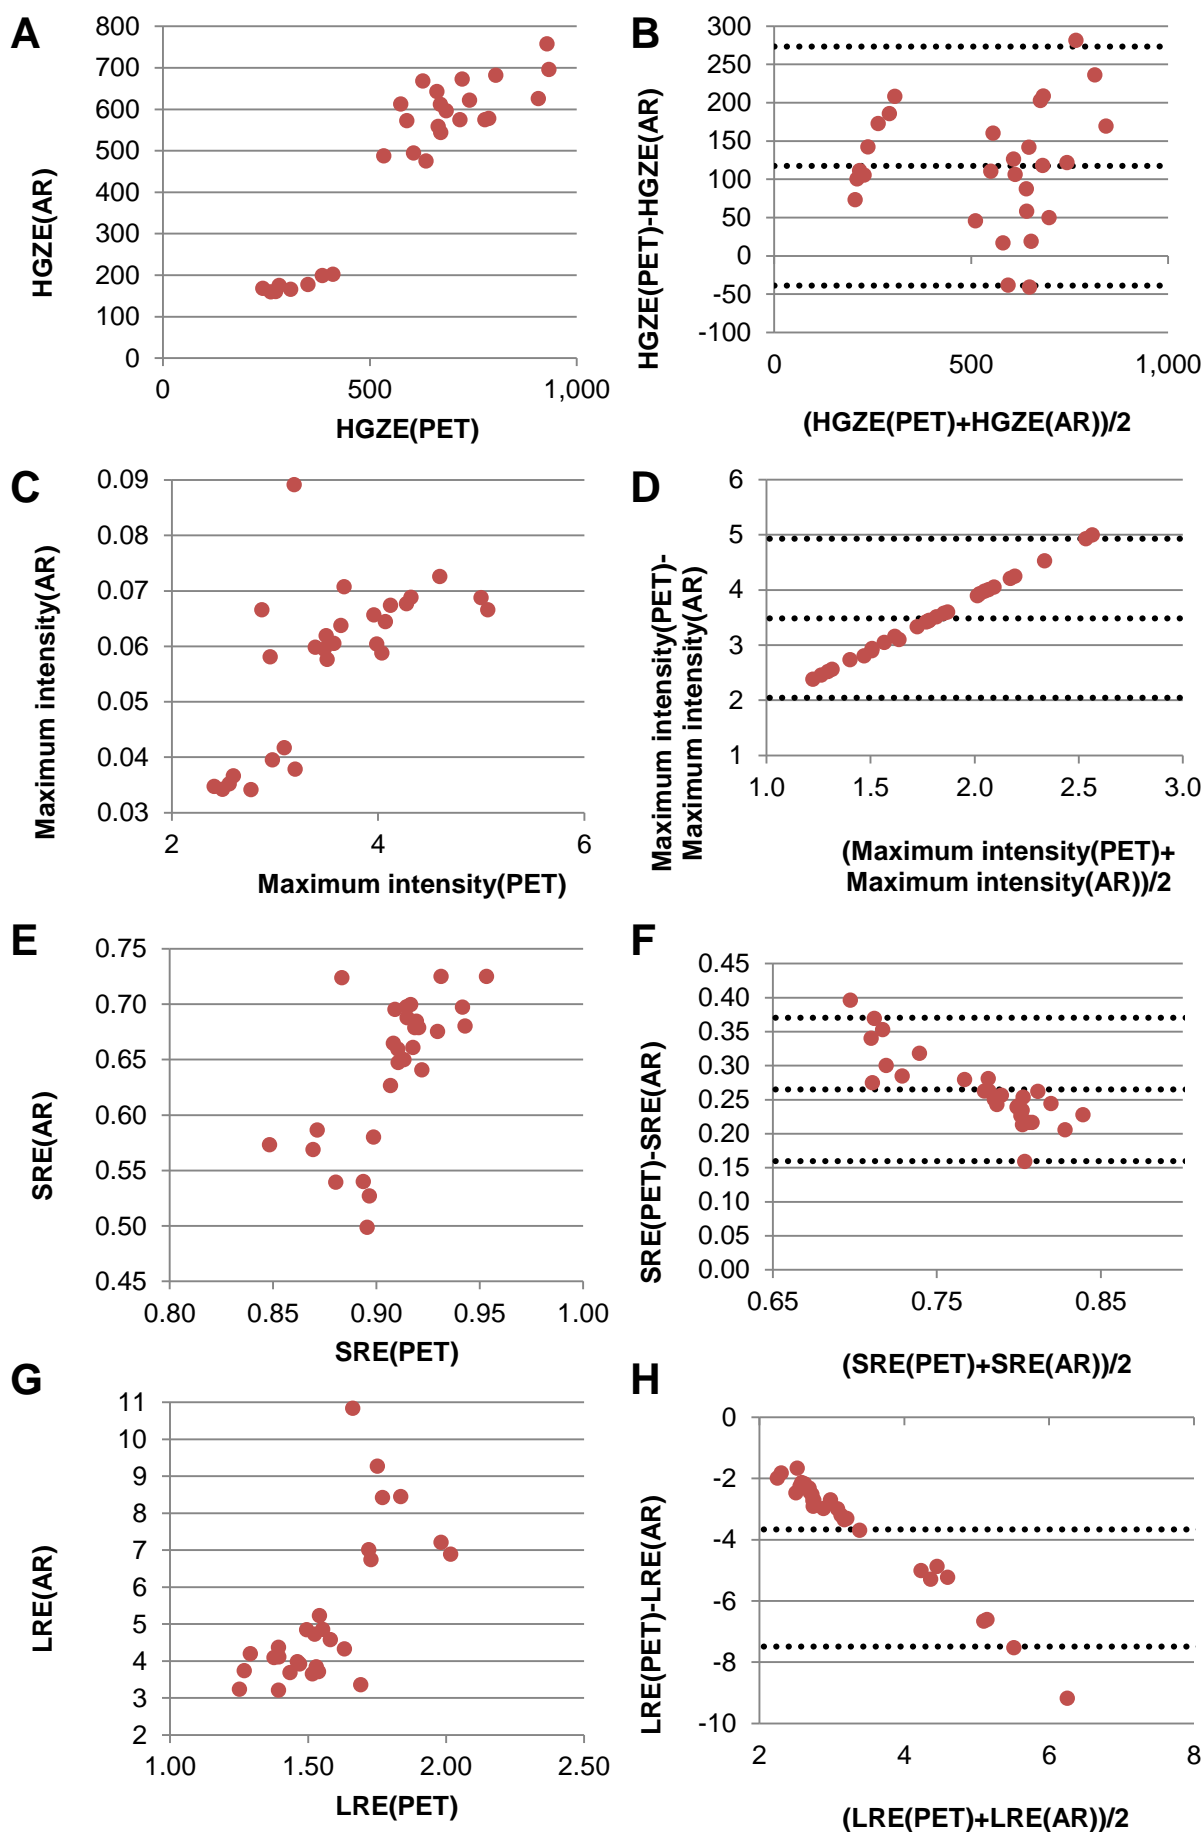

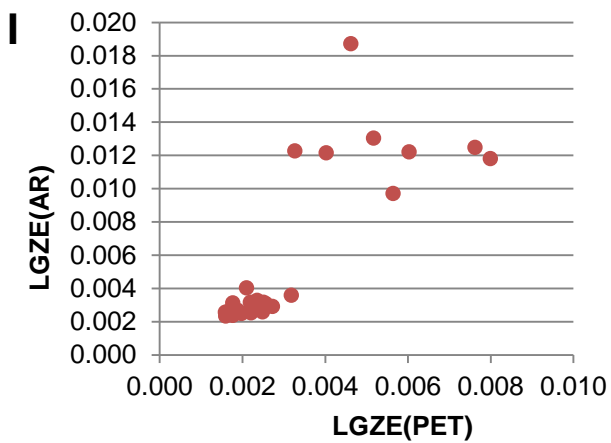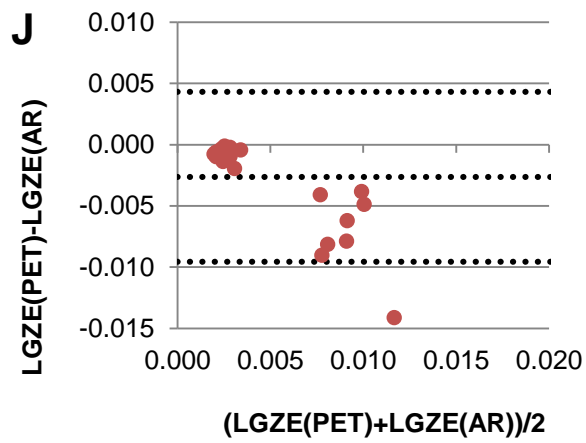

**SUPPLEMENTAL FIGURE 2:** Plots of index measured from autoradiography (AR) images (in purple) or PET images (in orange) as a function of index measured from histological slides.

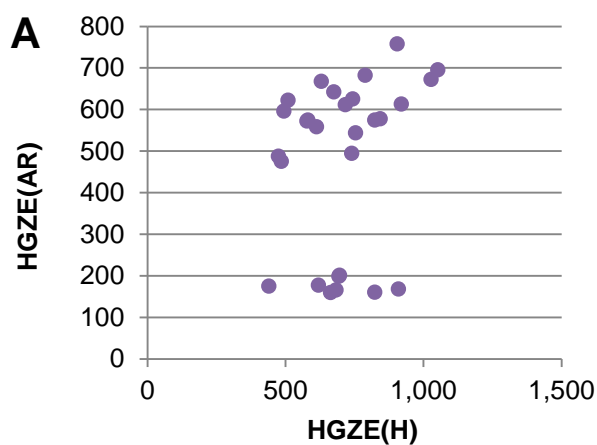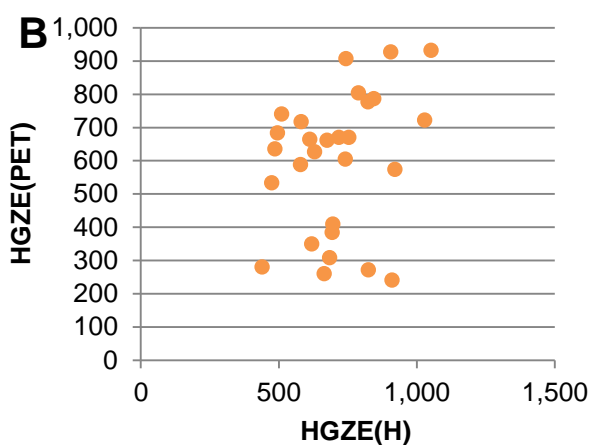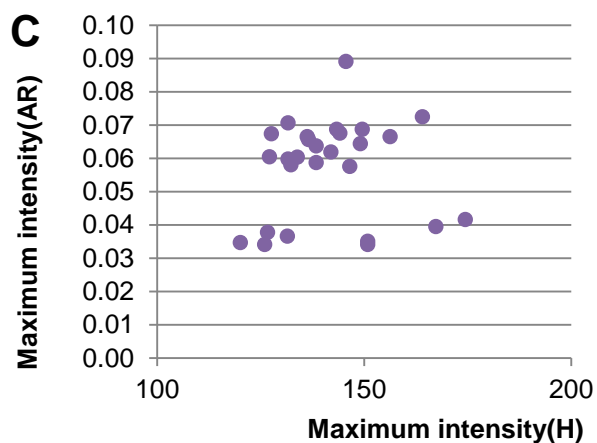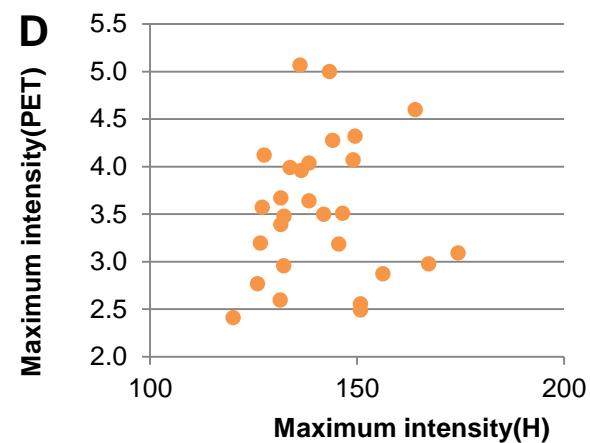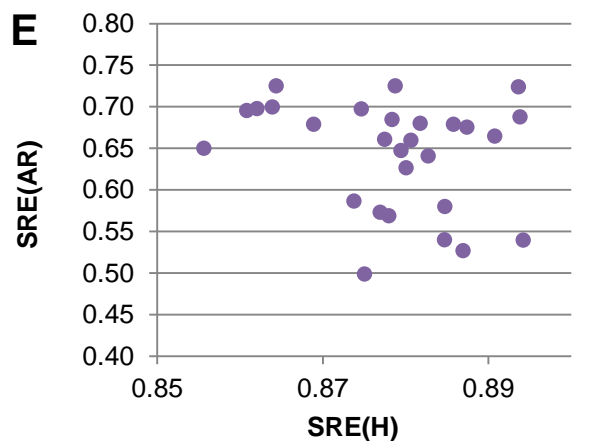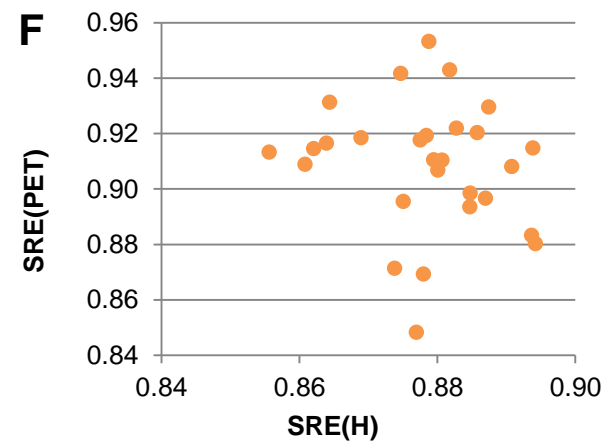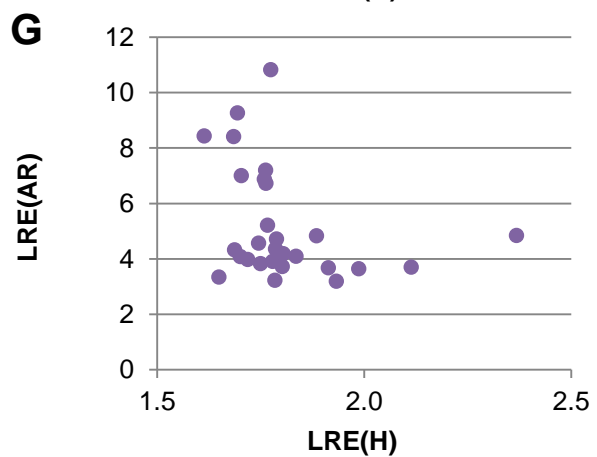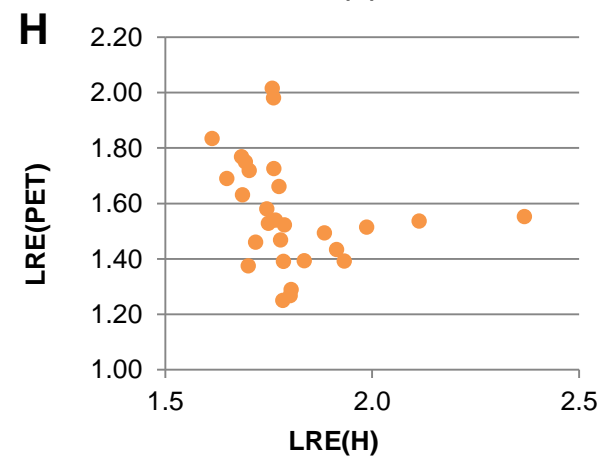

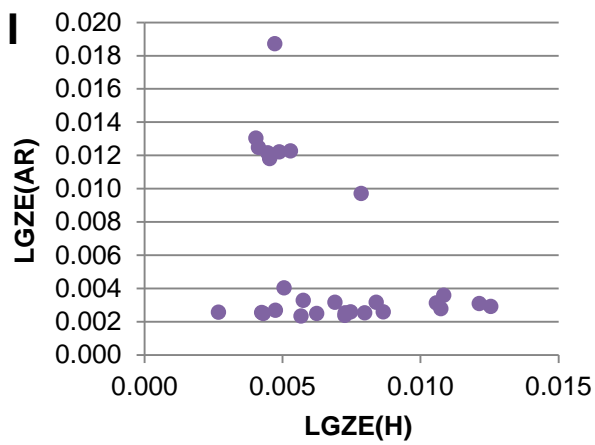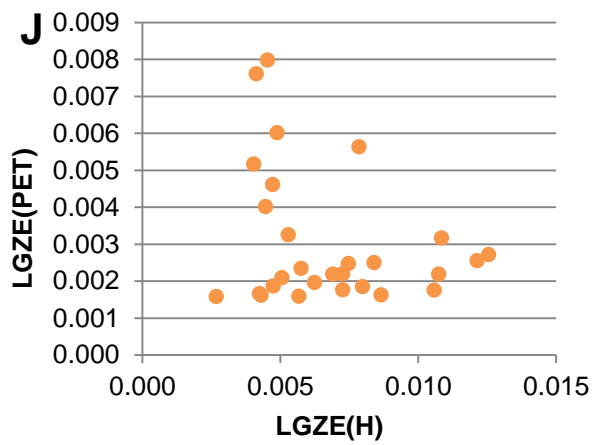

**SUPPLEMENTAL FIGURE 3:** Plots of index measured from resampled autoradiography (RAR) images as a function of index measured from autoradiography (AR) images (in blue) or index measured from smoothed and resampled autoradiography (SRAR) images as a function of index from RAR images (in green).

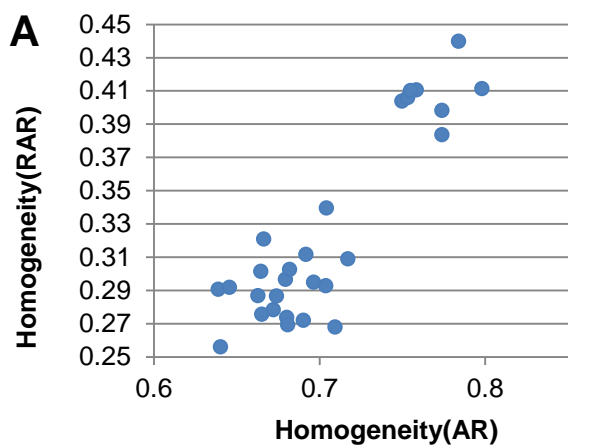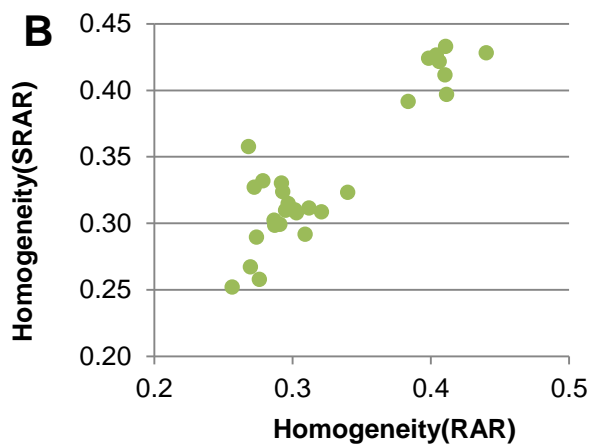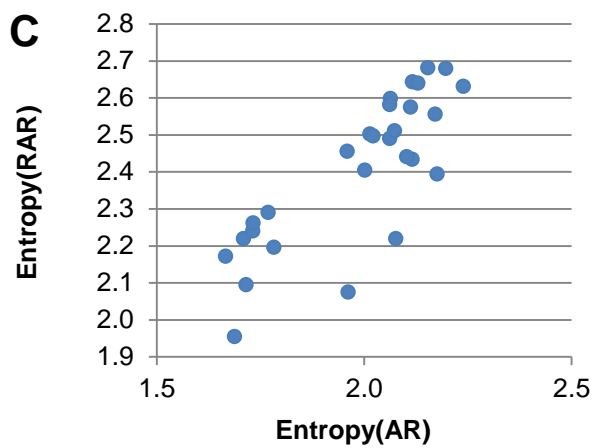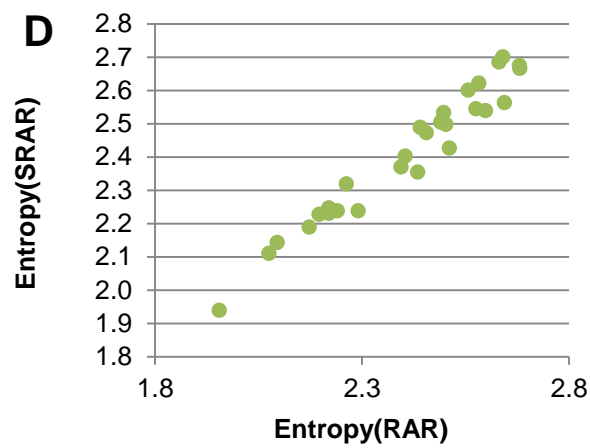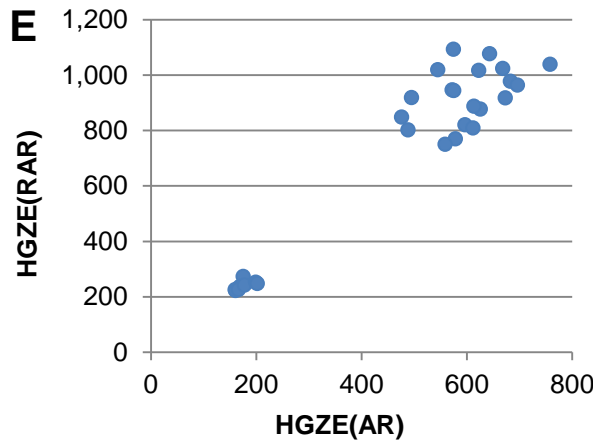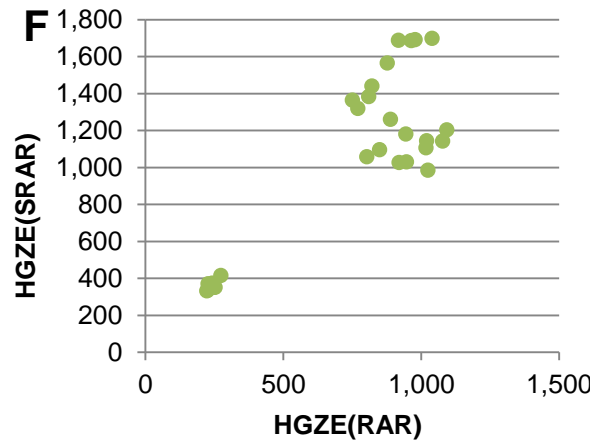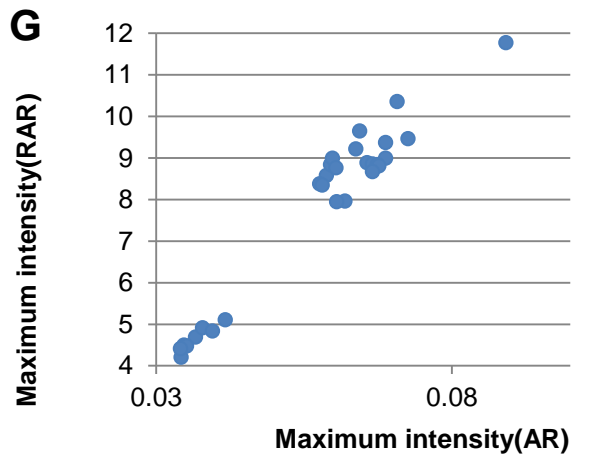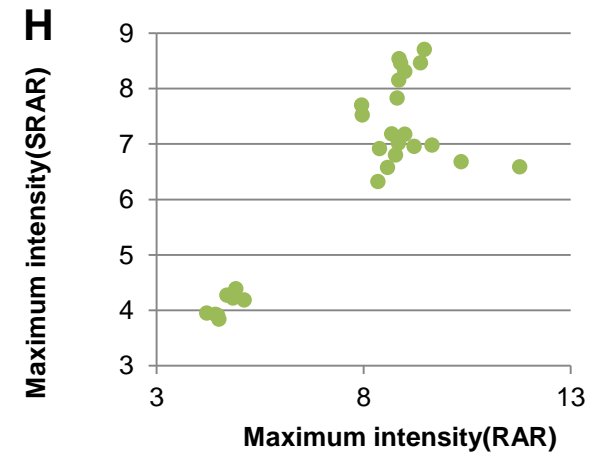

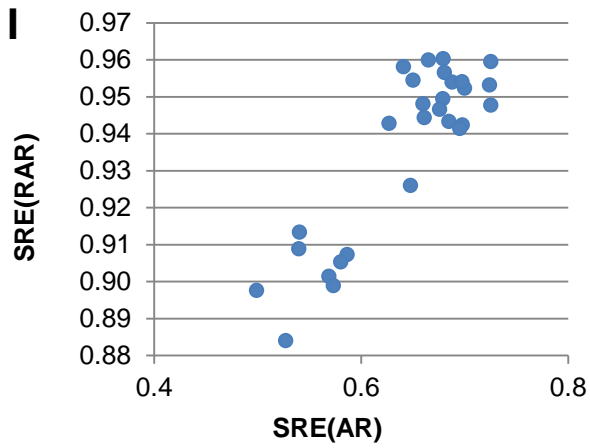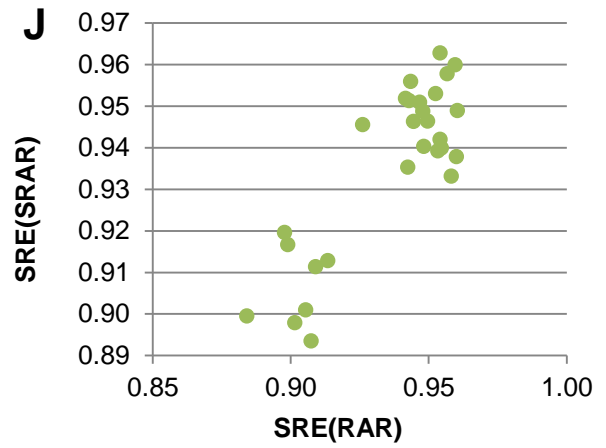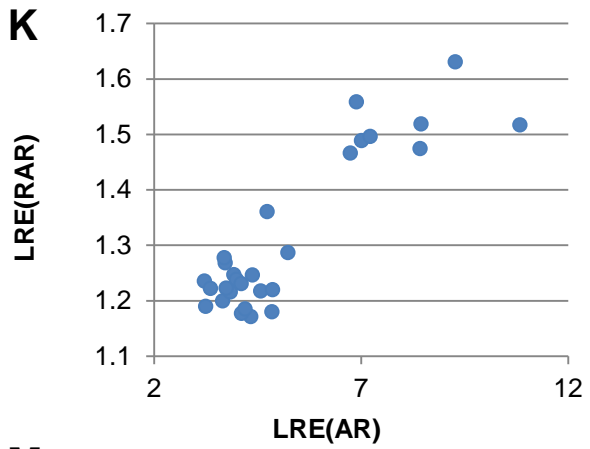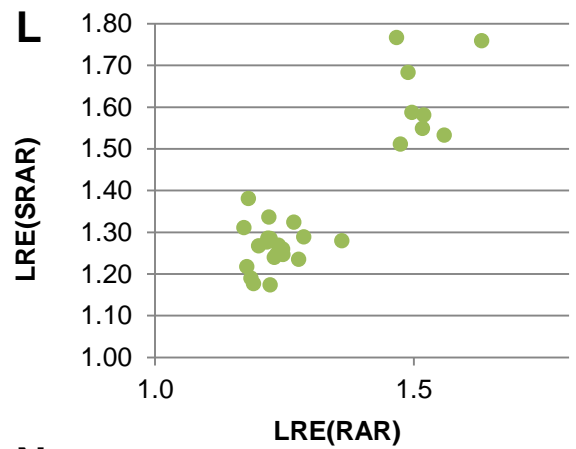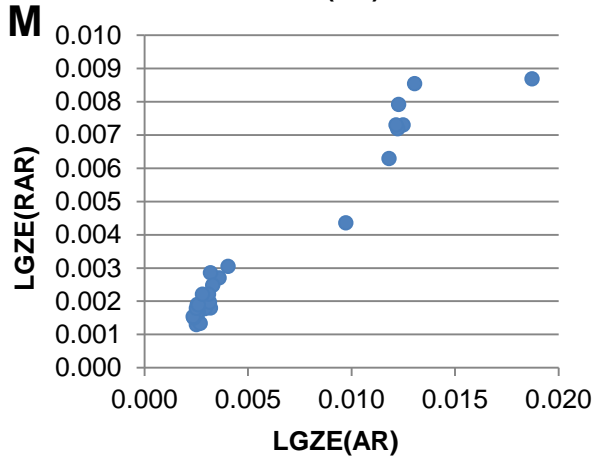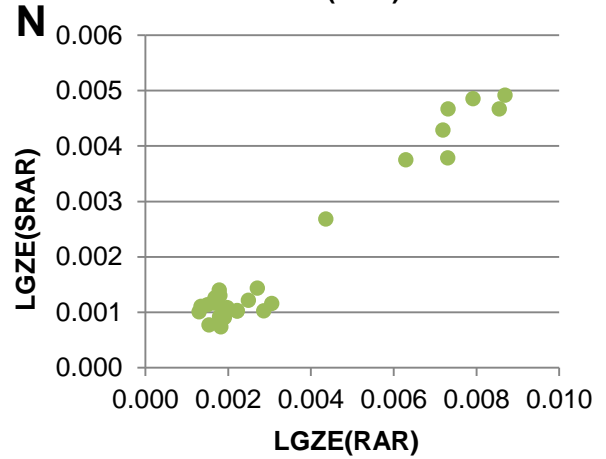

**SUPPLEMENTAL FIGURE 4:** Boxplots of TI computed from autoradiography images as a function of cell pattern (A, B and C) or as a function of the number of cells in homogeneous sub-regions (A+, A-). \*: pvalue of Wilcoxon's test < 5%. \*\*: pvalue of Wilcoxon's test < 1%.

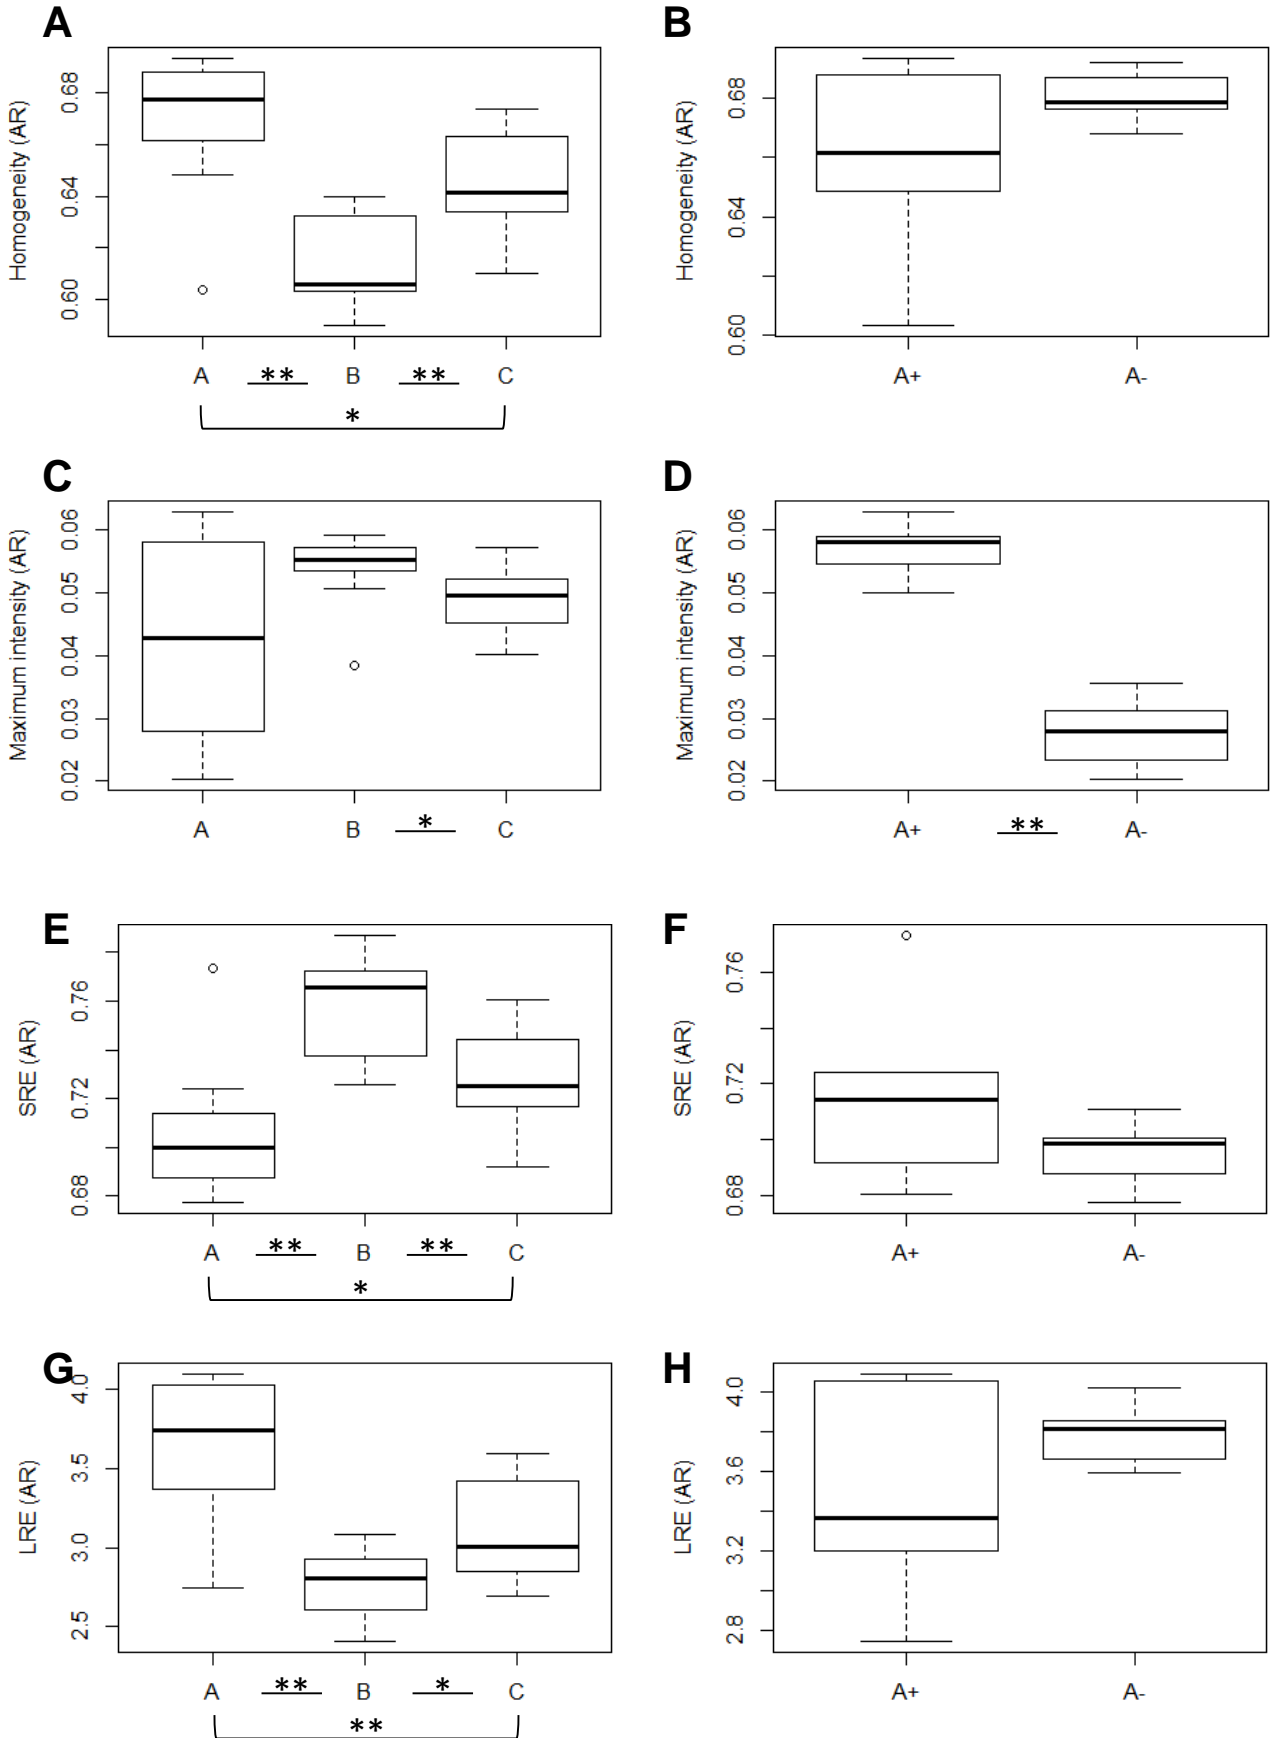



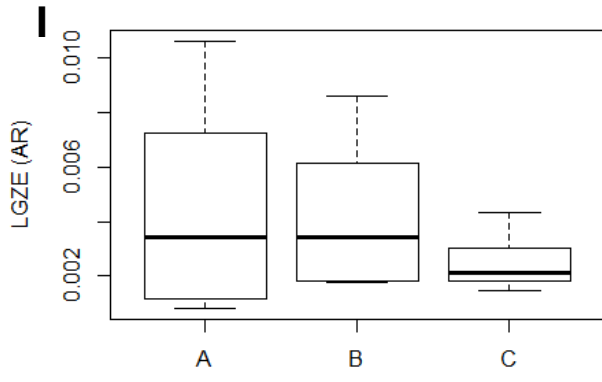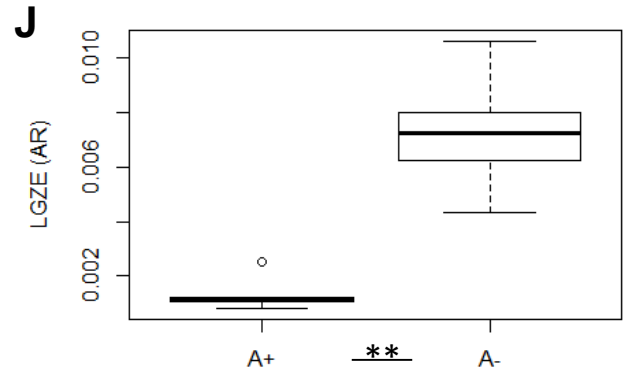

Supplement: 173708_Supplemental_Data.pdf [file 173708_Supplemental_Data.pdf]
